# Supplementary material for: Thermodynamic exploration of xenon/krypton separation based on a high-throughput screening
Source: Royal Society of Chemistry journal article supplement (doi:10.1039/d1fd00024a), 2021-01-01
Supplement: d1fd00024a1.pdf [file d1fd00024a1.pdf]

**Supporting Information for:**

**Thermodynamic exploration of xenon/krypton  
separation based on a high-throughput screening**

Emmanuel Ren<sup>†,‡</sup> and François-Xavier Coudert<sup>†</sup>

<sup>†</sup>*Chimie ParisTech, PSL University, CNRS, Institut de Recherche de Chimie Paris, 75005 Paris,  
France*

<sup>‡</sup>*CEA, DES, ISEC, DMRC, University of Montpellier, Marcoule, F-30207 Bagnols-sur-Cèze,  
France*

## Exchange equilibrium

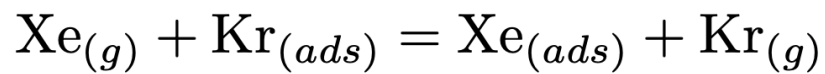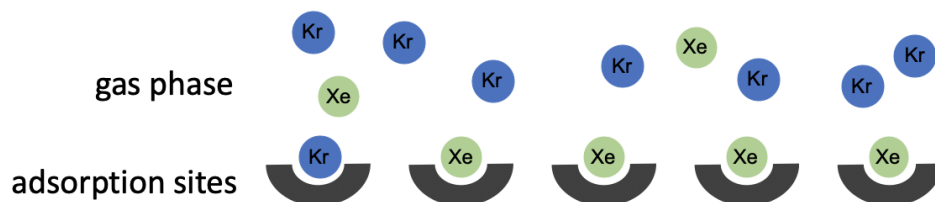

Figure S1: Representation of the fictitious exchange equilibrium between xenon and krypton considered in our study.

## Other correlations

It is possible to define an entropy of adsorption of a guest  $g$  for a given standard state ( $P^\circ=1$  atm):

$$\Delta_{\text{ads}}S_0^g = R \ln(P^\circ M_f K^g) + \frac{1}{T} \Delta_{\text{ads}}H_0^g \quad (\text{S1})$$

where  $R$  is the ideal gas constant,  $T$  is the temperature equals to 298 K,  $P^\circ$  is the pressure at atmospheric pressure and  $M_f$  is the framework's molar mass in  $\text{g mol}^{-1}$ ,  $K^g$  the Henry's constant of  $g$  and  $\Delta_{\text{ads}}H_0^g$  the adsorption enthalpy of  $g$ .

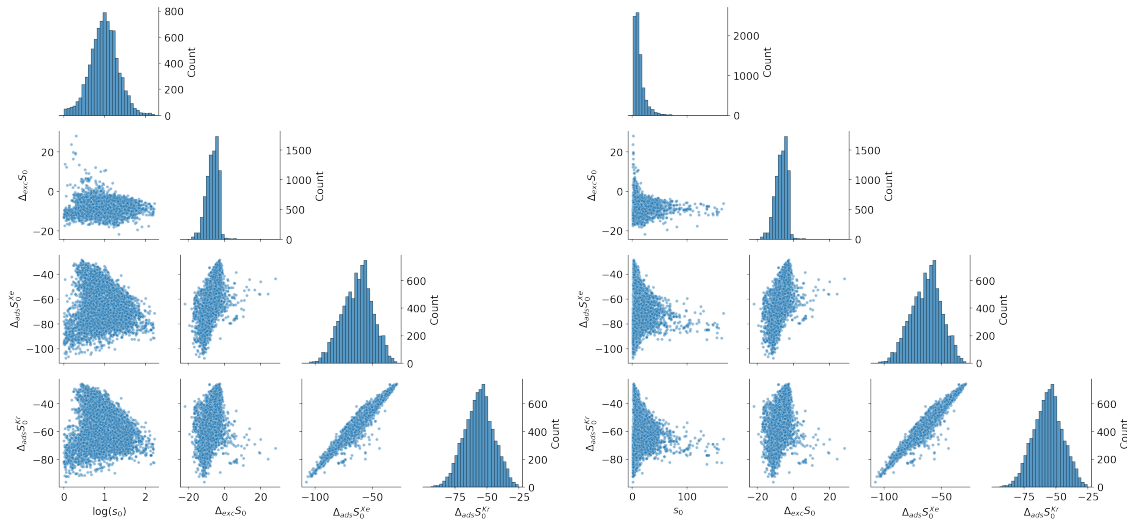

Figure S2: Entropy pair-plots in both linear and log scale.

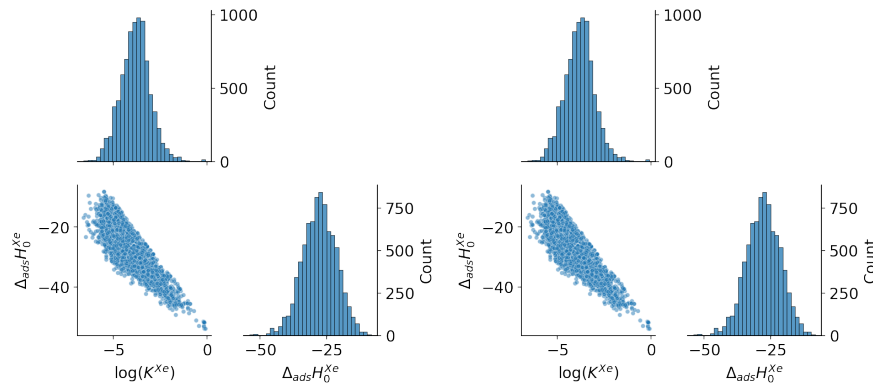

Figure S3: Correlation between henry coefficient and enthalpy for both xenon and krypton

## Difference of selectivity: the 90:10 composition case

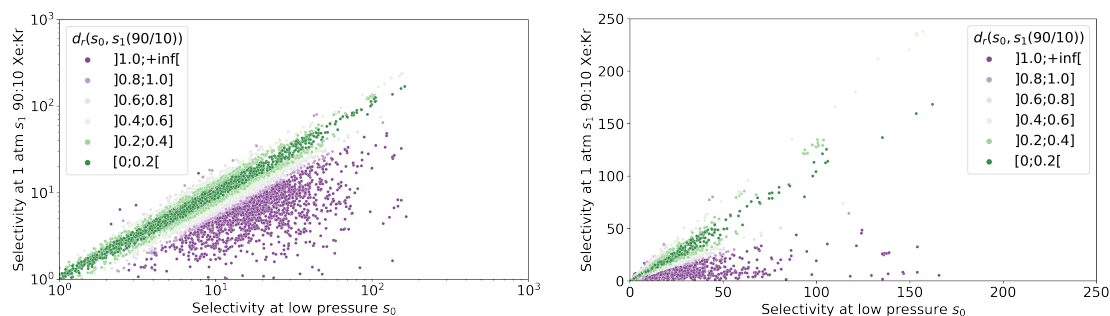

Figure S4: Overview at linear and log scale, comparison between  $s_0$  and  $s_1(90 : 10)$

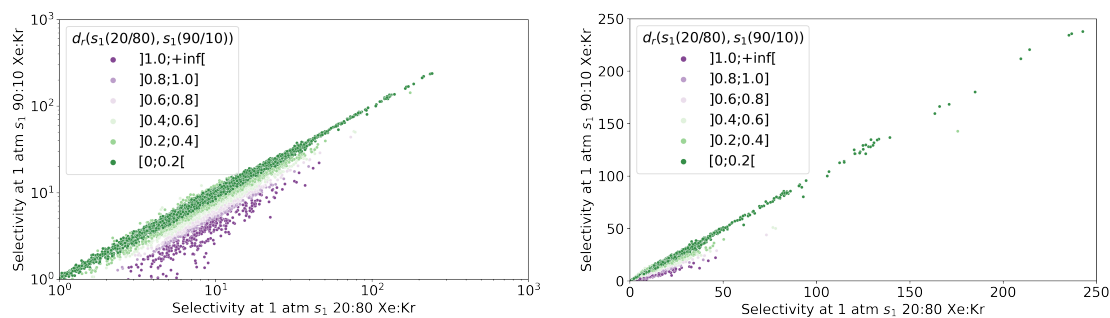

Figure S5: Overview at linear and log scale, comparison between  $s_1(20 : 80)$  and  $s_1(90 : 10)$

# Entropy and enthalpy between low an high selectivity

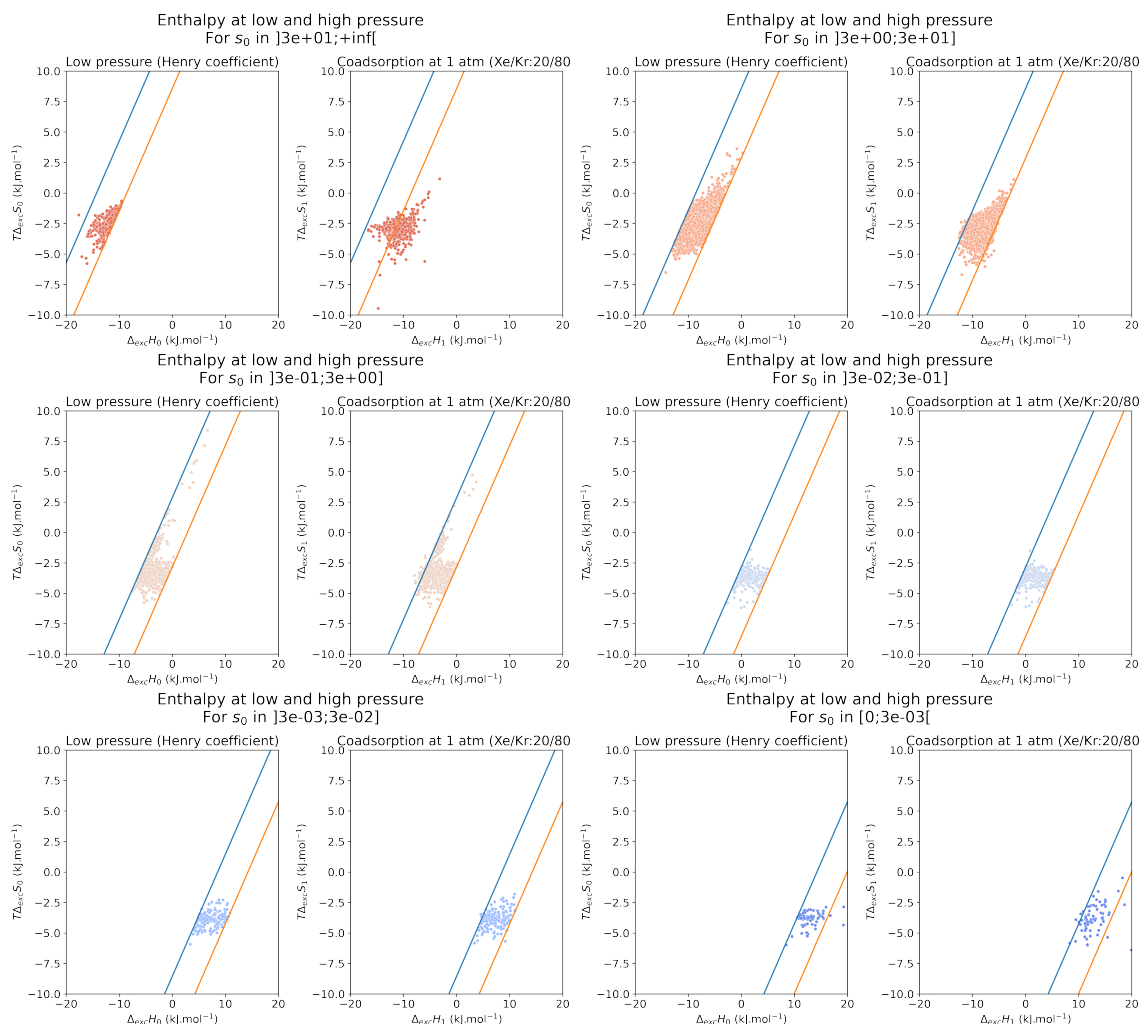

Figure S6: Split view of the figures 4 and 5 of the article. The iso-selectivity lines for the limit considered are represented with blue and orange lines.

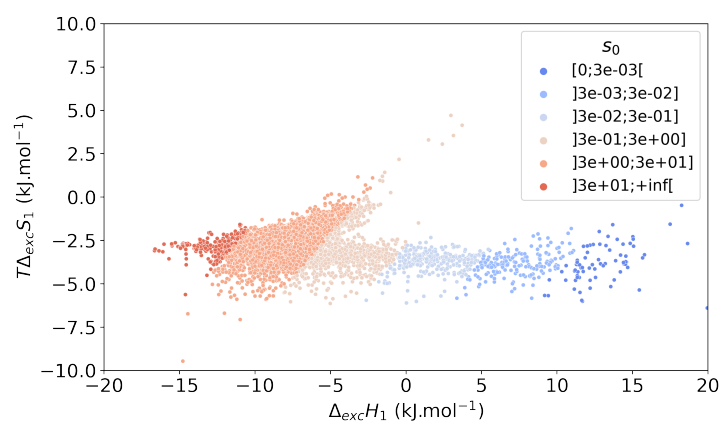

Figure S7: The energetic equivalent of exchange equilibrium entropy  $T\Delta_{\text{exc}}S_1$  and enthalpy  $\Delta_{\text{exc}}H_1$  at ambient pressure labeled using the selectivity  $s_1$  at ambient pressure.

## Distribution of the exchange enthalpy and entropy

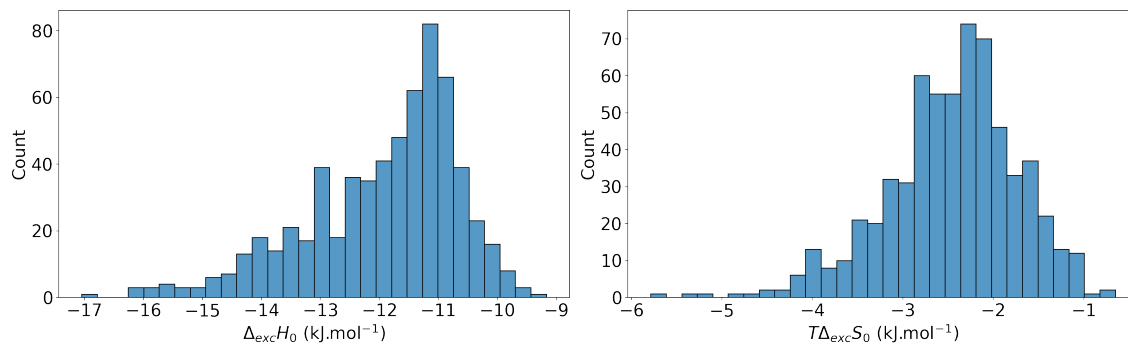

Figure S8: Distribution of the enthalpy and entropy of exchange at low pressure on the 630 most selective structures

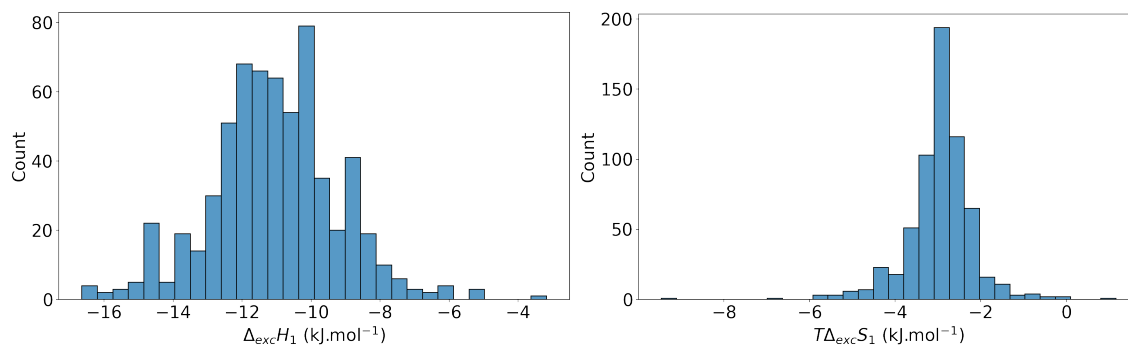

Figure S9: Distribution of the enthalpy and entropy of exchange at ambient pressure on the 630 most selective structures

# Raw data for the archetypal structures presented in the main article

Table S1: Raw thermodynamic quantities associated for a few representative examples of MOFs. Henry’s constant  $K^{\text{Xe}}$ ,  $K^{\text{Kr}}$  are in  $\text{mmol g}^{-1} \text{Pa}^{-1}$ , loadings  $q_1^{\text{Xe}}$  and  $q_1^{\text{Kr}}$  are in  $\text{mmol g}^{-1}$ , enthalpies  $\Delta_{\text{ads}}H_0^{\text{Xe}}$ ,  $\Delta_{\text{ads}}H_0^{\text{Kr}}$ ,  $\Delta_{\text{ads}}H_1^{\text{Xe}}$  and  $\Delta_{\text{ads}}H_1^{\text{Kr}}$  are in  $\text{kJ mol}^{-1}$ , and diameters  $D_i$  and  $D_f$  in Å

| CSD Refcode | $s_0$ | $K^{\text{Xe}}$      | $K^{\text{Kr}}$      | $\Delta_{\text{ads}}H_0^{\text{Xe}}$ | $\Delta_{\text{ads}}H_0^{\text{Kr}}$ | $s_1$ | $q_1^{\text{Xe}}$ | $q_1^{\text{Kr}}$ | $\Delta_{\text{ads}}H_1^{\text{Xe}}$ | $\Delta_{\text{ads}}H_1^{\text{Kr}}$ | $D_i$ | $D_f$ |
|-------------|-------|----------------------|----------------------|--------------------------------------|--------------------------------------|-------|-------------------|-------------------|--------------------------------------|--------------------------------------|-------|-------|
| VOKJIQ      | 157   | $7.92 \cdot 10^{-1}$ | $5.04 \cdot 10^{-3}$ | -53.9                                | -38.2                                | 243   | 2.57              | 0.04              | -61.1                                | -44.5                                | 4.8   | 2.9   |
| KAXQIL      | 104   | $3.01 \cdot 10^{-2}$ | $2.90 \cdot 10^{-4}$ | -44.6                                | -30.5                                | 133   | 1.41              | 0.04              | -41.5                                | -26.8                                | 5.1   | 3.8   |
| JUFBIX      | 106   | $1.59 \cdot 10^{-2}$ | $1.50 \cdot 10^{-4}$ | -45.6                                | -31.4                                | 115   | 0.80              | 0.03              | -45.7                                | -31.3                                | 5.0   | 2.7   |
| FALQOA      | 162   | $2.23 \cdot 10^{-2}$ | $1.38 \cdot 10^{-4}$ | -47.3                                | -32.0                                | 171   | 0.68              | 0.02              | -48.6                                | -33.1                                | 5.1   | 3.1   |
| GOMREG      | 114   | $9.16 \cdot 10^{-2}$ | $8.03 \cdot 10^{-4}$ | -44.7                                | -31.1                                | 74    | 2.59              | 0.14              | -47.5                                | -33.8                                | 5.4   | 3.6   |
| JAVTAC      | 117   | $1.24 \cdot 10^{-1}$ | $1.06 \cdot 10^{-3}$ | -47.7                                | -33.5                                | 67    | 1.50              | 0.09              | -48.5                                | -34.9                                | 5.1   | 3.9   |
| GOMRAC      | 124   | $1.17 \cdot 10^{-1}$ | $9.45 \cdot 10^{-4}$ | -45.6                                | -31.8                                | 47    | 2.51              | 0.21              | -47.3                                | -34.8                                | 5.3   | 3.4   |
| MISQIQ      | 139   | $6.87 \cdot 10^{-1}$ | $4.94 \cdot 10^{-3}$ | -51.9                                | -37.4                                | 37    | 2.30              | 0.25              | -45.6                                | -32.8                                | 4.2   | 4.1   |
| BAEDTA01    | 154   | $1.39 \cdot 10^{-2}$ | $9.04 \cdot 10^{-5}$ | -47.7                                | -31.7                                | 38    | 1.05              | 11                | -34.0                                | -23.1                                | 5.3   | 4.3   |
| VIWMOF      | 81    | $7.87 \cdot 10^{-3}$ | $9.70 \cdot 10^{-5}$ | -46.3                                | -30.1                                | 13    | 2.99              | 0.90              | -26.0                                | -17.8                                | 9.8   | 5.2   |
| LUDLAZ      | 166   | $9.04 \cdot 10^{-2}$ | $5.46 \cdot 10^{-4}$ | -45.4                                | -30.9                                | 16    | 1.59              | 0.39              | -38.3                                | -28.3                                | 6.6   | 4.2   |
| WOJJOV      | 146   | $4.19 \cdot 10^{-2}$ | $2.86 \cdot 10^{-4}$ | -46.4                                | -30.7                                | 14    | 2.82              | 0.81              | -33.0                                | -24.4                                | 7.8   | 6.4   |
| VAPBIZ      | 147   | $3.54 \cdot 10^{-2}$ | $2.41 \cdot 10^{-4}$ | -46.4                                | -30.5                                | 13    | 2.50              | 0.78              | -34.1                                | -25.3                                | 6.3   | 3.6   |

**Lennard-Jones (LJ) potentials** The van der Waals interaction can be approximately modeled by the following potential  $V_{\text{LJ}}$ :

$$V_{\text{LJ}} = 4\varepsilon \left( \left( \frac{\sigma}{r} \right)^{12} - \left( \frac{\sigma}{r} \right)^6 \right) \quad (\text{S2})$$

where  $\varepsilon$  is the depth of the well (minimal energy),  $\sigma$  is the distance from which the interaction becomes stabilizing and  $r$  is the distance between the two interacting atoms.

**Lorentz-Berthelot rules** From LJ parameters of interactions between the same type of atoms we can determine interactions between different types of atoms:

$$\begin{aligned} \varepsilon_{ij} &= \sqrt{\varepsilon_{ii} \times \varepsilon_{jj}} \\ \sigma_{ij} &= \frac{\sigma_{ii} + \sigma_{jj}}{2} \end{aligned} \quad (\text{S3})$$



where  $i$  and  $j$  are indexes corresponding to two different types of atoms (e.g.,  $i=\text{Xe}$  and  $j=\text{Kr}$ )

**Langmuir 1-site** At given temperature, some mono-site materials' isotherm can be described by the following equation:

$$q(P) = N_{\max} \frac{KP}{1 + KP} \quad (\text{S4})$$

where  $q$  is the loading of a given mono-component gas,  $K$  is the adsorption equilibrium constant and  $P$  is the pressure.

**Langmuir 2-site** At given temperature, some two-site materials' isotherm can be described by the following equation:

$$q(P) = N_{\max} \left( (1 - \alpha_2) \frac{K_1 P}{1 + K_1 P} + \alpha_2 \frac{K_2 P}{1 + K_2 P} \right) \quad (\text{S5})$$

where  $q$  is the loading of a given mono-component gas,  $K_1$  and  $K_2$  are the adsorption equilibrium constants in the respective sites,  $\alpha_2$  is the proportion of secondary sites, and  $P$  is the pressure.

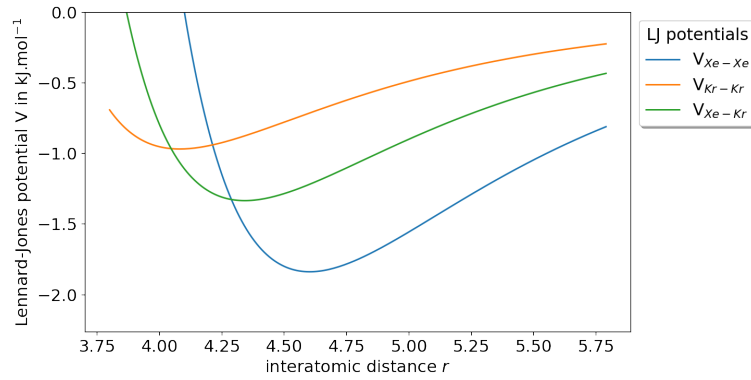

Figure S10: The LJ potentials for xenon and krypton interactions. The xenon-xenon interaction is more stabilizing than the krypton-krypton interaction for inter-atomic distance higher than 4.2 Å.

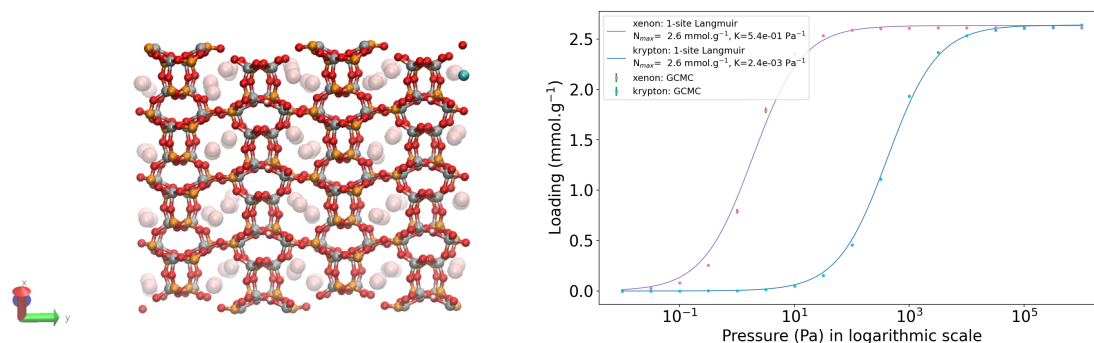

Figure S11: VOKJIQ: On the left side, an illustration of a clean version (all solvent removed) of the open-framework aluminophosphate [HAl<sub>3</sub>P<sub>3</sub>O<sub>13</sub>]·C<sub>3</sub>NH<sub>10</sub> loaded with xenon and krypton obtained by GCMC calculations. Color code: Al in silver, P in orange, O in red, H in white ; Xe in transparent pink and Kr in cyan for the adsorbates. The mono-component isotherms fitted with a 1-site Langmuir model for both xenon and krypton at 298 K is represented on the right side.

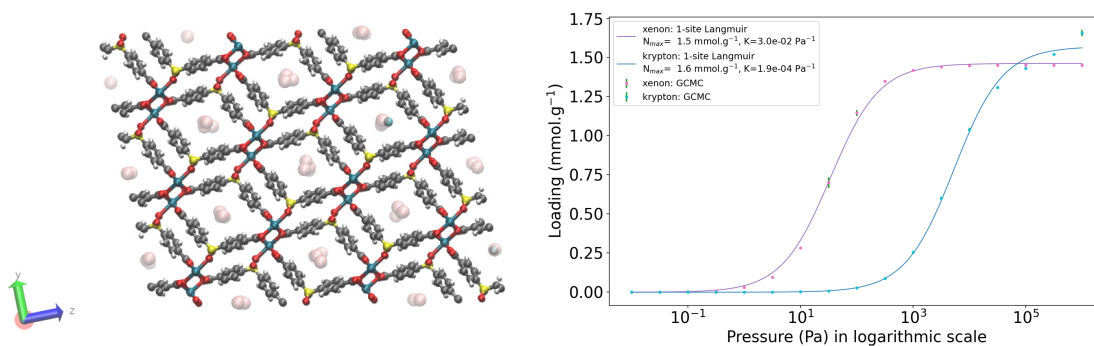

Figure S12: KAXQIL: On the left side, an illustration of a clean version (all solvent removed) of the calcium coordination framework [Ca(SDB)]·H<sub>2</sub>O, where SDB = 4,4'-sulfonyldibenzoate loaded with xenon and krypton obtained by GCMC calculations. Color code: Ca in dark cyan, C in gray, O in red, H in white, S in yellow ; Xe in transparent pink and Kr in cyan for the adsorbates. The mono-component isotherms fitted with a 1-site Langmuir model for both xenon and krypton at 298 K is represented on the right side.

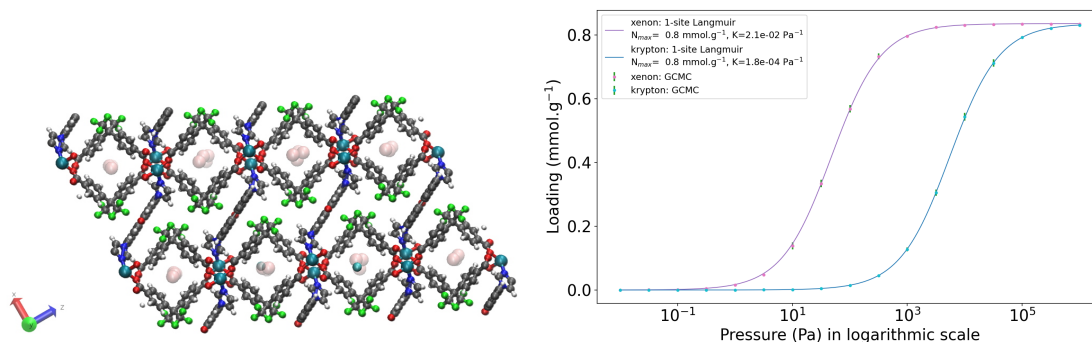

Figure S13: JUFBIx: Representation of a clean version (all solvent removed) of the cobalt(II) coordination framework  $[\text{Co}_2(\text{L})(\text{ppda})_2]_2 \cdot \text{H}_2\text{O}$ , where the ligand L is 2,8-di(1*H*-imidazol-1-yl)dibenzofuran and the carboxylic acid ligand  $\text{H}_2\text{ppda}$  is 4,4'-(perfluoropropane-2,2-diyl)dibenzoic acid loaded with xenon and krypton obtained by GCMC calculations. Color code: Co in dark cyan, C in gray, O in red, H in white, N in blue, F in green ; Xe in transparent pink and Kr in cyan for the adsorbates. The mono-component isotherms fitted with a 1-site Langmuir model for both xenon and krypton at 298 K is represented on the right side.

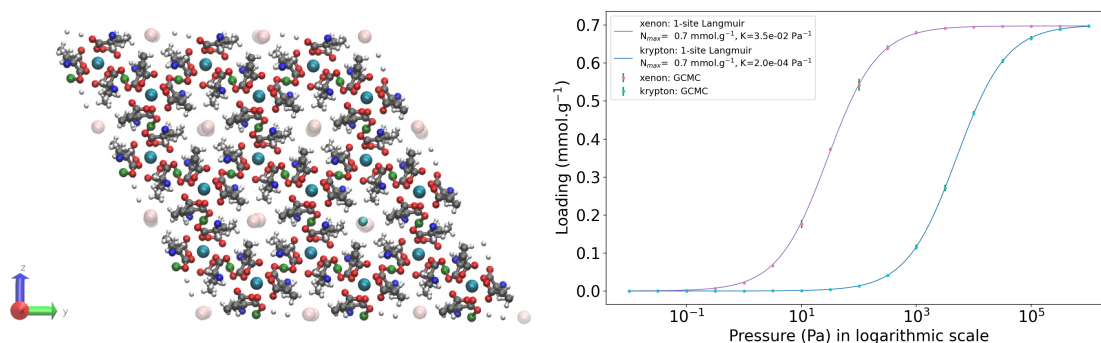

Figure S14: FALQOA: Representation of a clean version (all solvent removed) of the Nd-Cu heterometallic coordination polymer  $[\text{Nd}_2\text{Cu}_3(\text{ANMA})_6] \cdot 3(\text{H}_2\text{O})$ , where the ligand ANMA is the deprotonated form of  $\text{H}_2\text{ANMA}$  = L-alanine-*N*-monoacetic acid loaded with xenon and krypton obtained by GCMC calculations. Color code: Cu in dark green, Nd in dark cyan, C in gray, O in red, H in white, N in blue ; Xe in transparent pink and Kr in cyan for the adsorbates. The mono-component isotherms fitted with a 1-site Langmuir model for both xenon and krypton at 298 K is represented on the right side.

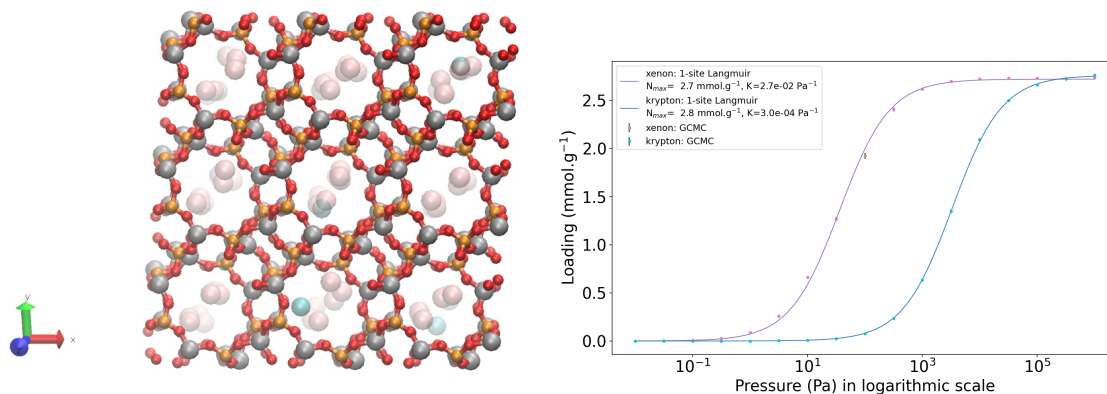

Figure S15: GOMREG: Representation of a clean version (all solvent removed) of this aluminophosphate  $\text{AlPO}_4\text{-}n$  that has a zeotype LAU topology with one-dimensional 10-ring channels loaded with xenon and krypton obtained by GCMC calculations. Color code: Al in silver, P in orange, O in red ; Xe in transparent pink and Kr in cyan for the adsorbates. The mono-component isotherms fitted with a 1-site Langmuir model for both xenon and krypton at 298 K is represented on the right side.

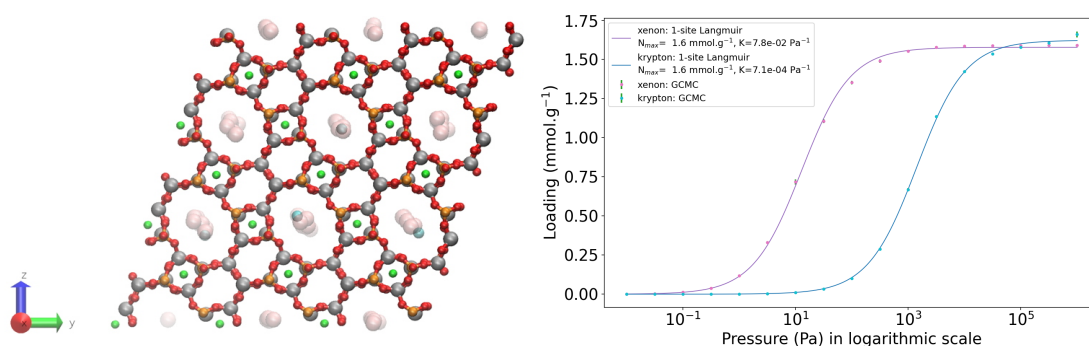

Figure S16: JAVTAC: Representation of a clean version (all solvent removed) of this open-framework fluoroaluminophosphate SIZ-3  $[\text{Al}_5\text{P}_5\text{O}_{20}\text{F}_2] \cdot 2(\text{C}_6\text{H}_{11}\text{N}_2)$  that has an AIPO-11 framework structure loaded with xenon and krypton obtained by GCMC calculations. Color code: Al in silver, P in orange, O in red, F in green ; Xe in transparent pink and Kr in cyan for the adsorbates. The mono-component isotherms fitted with a 1-site Langmuir model for both xenon and krypton at 298 K is represented on the right side.

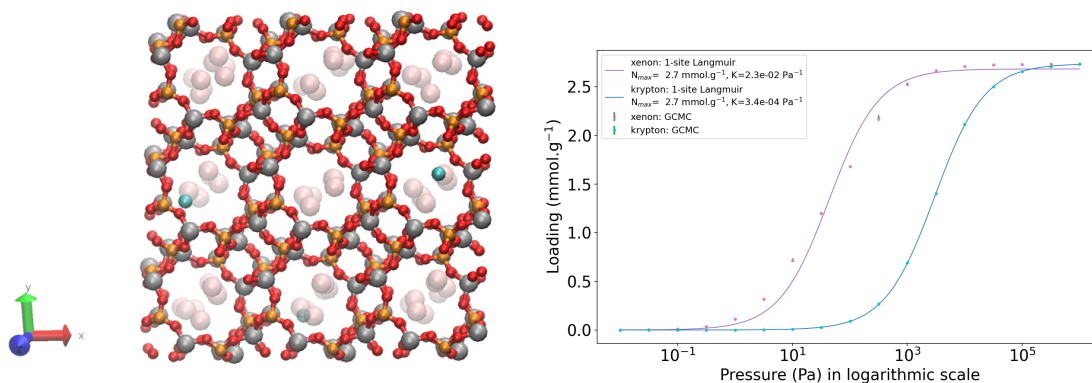

Figure S17: GOMRAC: Representation of a clean version (all solvent removed) of this aluminophosphate  $\text{AlPO}_4\text{-}n$  that has a zeotype LAU topology with one-dimensional 10-ring channels loaded with xenon and krypton obtained by GCMC calculations. Color code: Al in silver, P in orange, O in red ; Xe in transparent pink and Kr in cyan for the adsorbates. The mono-component isotherms fitted with a 1-site Langmuir model for both xenon and krypton at 298 K is represented on the right side. It seems that this aluminophosphate is just a smaller version of GOMREG.

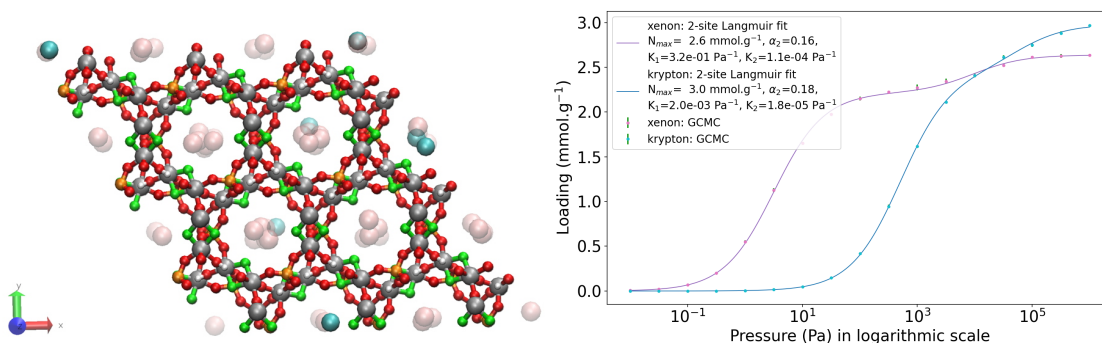

Figure S18: MISQIQ: Representation of a chiral open-framework fluoroaluminophosphate  $[\text{Al}_6\text{P}_3\text{O}_{12}\text{F}_6(\text{OH})_6] \cdot \text{C}_4\text{N}_3\text{H}_{16}$  denoted AIPO-JU89 on the left side. Color code: Al in silver, P in orange, O in red, H in white and F in green for the framework ; and Xe in transparent pink and Kr in cyan for the adsorbates. The mono-component isotherms fitted with a 2-site Langmuir model for both xenon and krypton at 298 K on the right side.

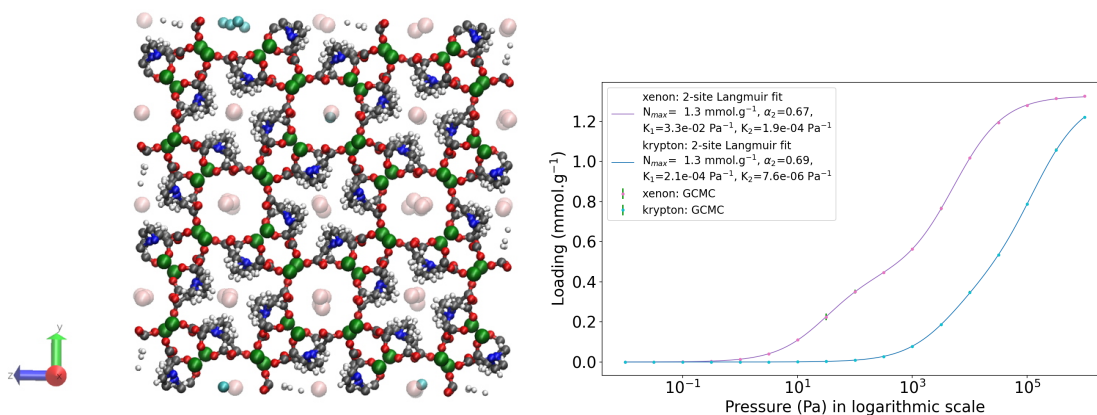

Figure S19: BAEDTA01: Representation of a baryum-based MOF [Ba<sub>2</sub>(EDTA)]·2.5(H<sub>2</sub>O), where EDTA is the deprotonated form of H<sub>2</sub>EDTA = ethylenediaminetetraacetic acid, on the left side. Color code: Ba in dark green, C in gray, O in red, H in white, N in blue for the framework ; and Xe in transparent pink and Kr in cyan for the adsorbates. The mono-component isotherms fitted with a 2-site Langmuir model for both xenon and krypton at 298 K, on the right side.

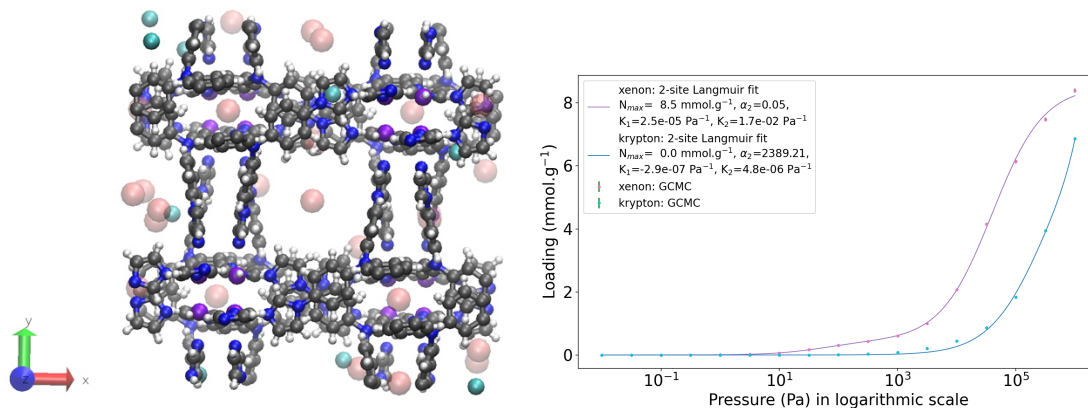

Figure S20: VIWMOF: Representation of a chiral cadmium-based MOF conglomerate [Cd(tipa)(μ<sub>3</sub>-OH)]·NO<sub>3</sub>·EtOH·DMF where tipa is tris(4-(1*H*-imidazol-1-yl)phenyl)amine and DMF is dimethylformamide, on the left side. Color code: Cd in dark pink, C in gray, H in white, N in blue for the framework ; and Xe in transparent pink and Kr in cyan for the adsorbates. The mono-component isotherms fitted with a 2-site Langmuir model for both xenon and krypton at 298 K, on the right side.



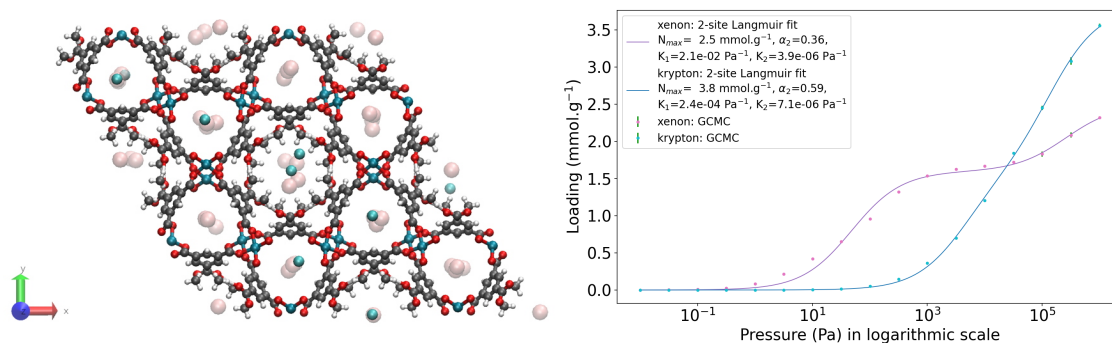

Figure S21: LUDLAZ: Representation of a copper-based MOF known as STAM-1  $[\text{Cu}_3\text{O}_{21}\text{C}_{30}\text{H}_{24}] \cdot 5(\text{H}_2\text{O})$ , on the left side. Color code: Cu in dark cyan, C in gray, O in red, H in white for the framework ; and Xe in transparent pink and Kr in cyan for the adsorbates. The mono-component isotherms fitted with a 2-site Langmuir model for both xenon and krypton at 298 K, on the right side.

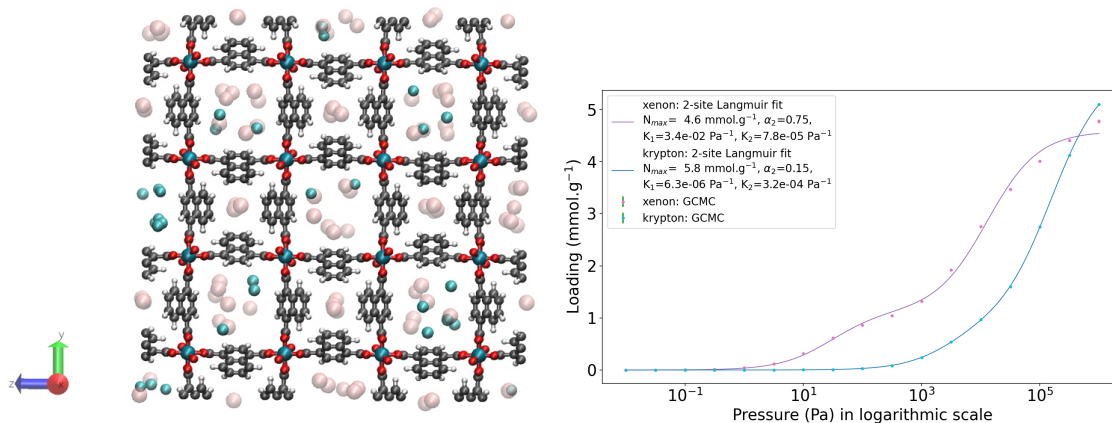

Figure S22: WOJJOV: Representation of an aluminium-based MOF  $[\text{Al}(\text{OH})(1,4\text{-NDC})] \cdot 2(\text{H}_2\text{O})$  where NDC means naphthalenedicarboxylate, on the left side. Color code: Cu in dark cyan, C in gray, O in red, H in white for the framework ; and Xe in transparent pink and Kr in cyan for the adsorbates. The mono-component isotherms fitted with a 2-site Langmuir model for both xenon and krypton at 298 K, on the right side.

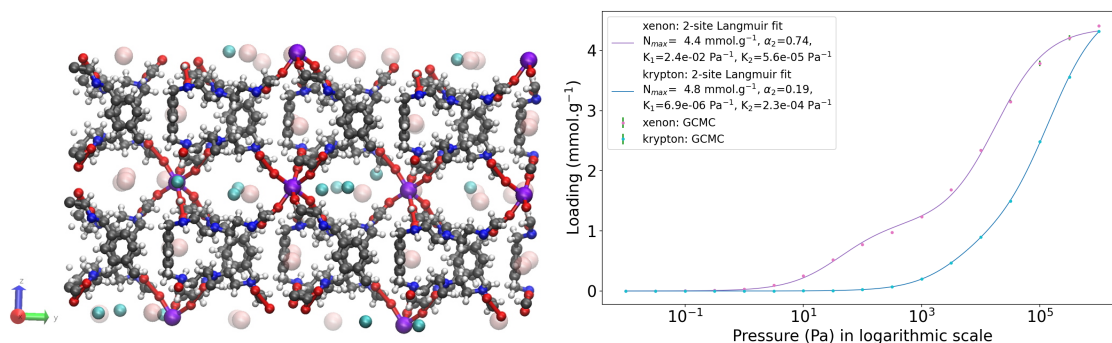

Figure S23: VAPBIZ: Representation of a europium-based homochiral MOF  $[\text{EuL}(\text{NO}_3)_3(\text{H}_2\text{O})] \cdot 13(\text{H}_2\text{O})$  where L is an achiral hexacarboxylic ligand, on the left side. Color code: Cu in dark cyan, C in gray, O in red, H in white for the framework ; and Xe in transparent pink and Kr in cyan for the adsorbates. The mono-component isotherms fitted with a 2-site Langmuir model for both xenon and krypton at 298 K, on the right side.
